# Supplementary material for: Effects of disease, antibiotic treatment and recovery trajectory on the microbiome of farmed seabass (Dicentrarchus labrax)
Source: PubMed Central journal article supplement (PMC6908611; doi:10.1038/s41598-019-55314-4), 2019-12-12
Supplement: 41598_2019_55314_MOESM2_ESM.pdf [file 41598_2019_55314_MOESM2_ESM.pdf]

# Supplementary information

## **Effects of disease, antibiotic treatment and recovery trajectory on the microbiome of farmed seabass (*Dicentrarchus labrax*)**

Daniela Rosado, Raquel Xavier\*, Ricardo Severino, Fernando Tavares, Jo Cable, Marcos Pérez-Losada

\*Corresponding author: Raquel Xavier - [raq.xavier@cibio.up.pt](mailto:raq.xavier@cibio.up.pt)

### **Supplementary Figure**

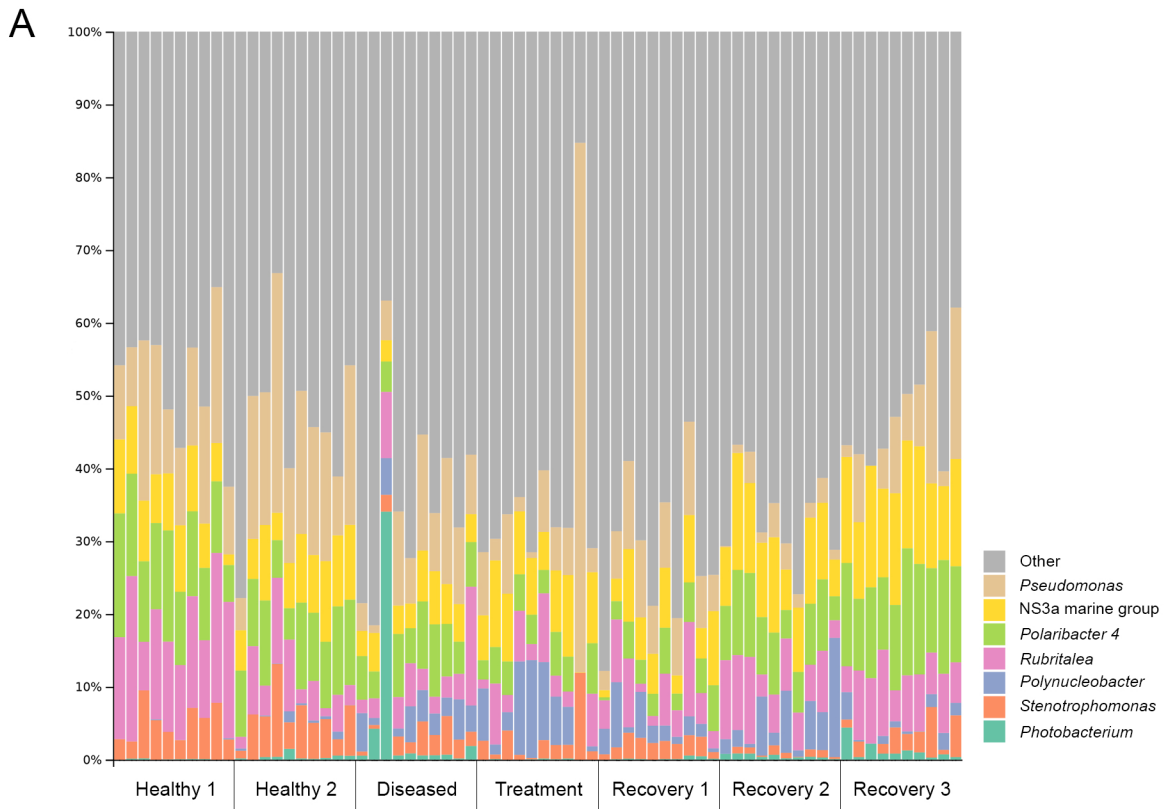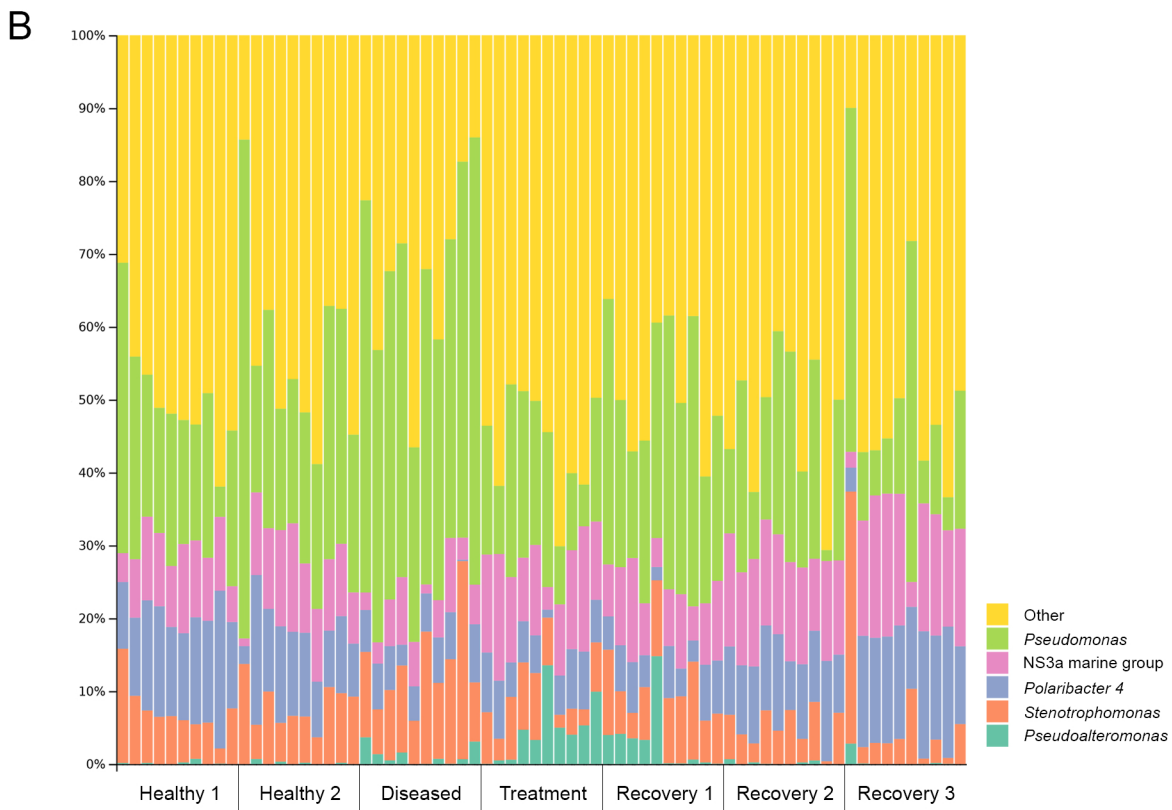

**Supplementary Figure S1:** Individual microbial variation of the most abundant (>5%) genera recovered from the gill (A) and skin (B) of the seabass. Distinctive bars represent relative abundance of each genus.
